# Supplementary material
Source: HighWire-hosted journal article supplement (https://bmjopen.bmj.com/content/6/6/e011065)
Supplement: inline-supplementary-material-1 [file inline-supplementary-material-1.pdf]

|                                                                                                     |     |                                                                                                                                                                                                        |     |                                                                                                                                                                  |     |                                                                                                                                                 |     |                                                                                                                                     |     |       |
|-----------------------------------------------------------------------------------------------------|-----|--------------------------------------------------------------------------------------------------------------------------------------------------------------------------------------------------------|-----|------------------------------------------------------------------------------------------------------------------------------------------------------------------|-----|-------------------------------------------------------------------------------------------------------------------------------------------------|-----|-------------------------------------------------------------------------------------------------------------------------------------|-----|-------|
| “physical activity”<br>OR<br>“physical education”<br>OR<br>exercise<br>OR<br>fitness<br>OR<br>sport | AND | cognition<br>OR<br>executive<br>OR<br>“executive function”<br>OR<br>“ executive function”<br>OR<br>“cognitive control”<br>OR<br>intelligence<br>OR<br>memory<br>OR<br>attention<br>OR<br>metacognition | AND | academic<br>OR<br>“academic achievement”<br>OR<br>“academic grades”<br>OR<br>“academic behaviour”<br>OR<br>“academic performance”<br>OR<br>“classroom behaviour” | AND | “brain development”<br>OR<br>“brain health”<br>OR<br>Neural<br>OR<br>neuroelectric<br>OR<br>neurotrophic<br>OR<br>neurotrophin<br>OR<br>hormone | AND | children<br>OR<br>childhood<br>OR<br>pre-schooler<br>OR<br>schooler<br>OR<br>preadolescent<br>OR<br>adolescent<br>OR<br>adolescence | AND | trial |
|-----------------------------------------------------------------------------------------------------|-----|--------------------------------------------------------------------------------------------------------------------------------------------------------------------------------------------------------|-----|------------------------------------------------------------------------------------------------------------------------------------------------------------------|-----|-------------------------------------------------------------------------------------------------------------------------------------------------|-----|-------------------------------------------------------------------------------------------------------------------------------------|-----|-------|

**Appendix I.** Search strategy for MEDLINE database.

**Appendix II:** Table for extraction data as reported by the authors.

| Author and year of publication | Country | N (CG/EG1/EG2) | Age of participants | CG/EG1/EG2 characteristics (min, d/w) | Intervention components | Length (weeks) | Neurocognitive recall |
|--------------------------------|---------|----------------|---------------------|---------------------------------------|-------------------------|----------------|-----------------------|
|                                |         |                |                     |                                       |                         |                |                       |

CG: Control Group, EG1: Experimental Group 1, EG2: Experimental Group 2, min: minutes, d/w: days a week.
